# Supplementary material
Source: HighWire-hosted journal article supplement (https://jnm.snmjournals.org/highwire/filestream/94810/field_highwire_adjunct_files/0/157768_Supplemental_Data.pdf)
Supplement: 157768_Supplemental_Data.pdf [file 157768_Supplemental_Data.pdf]

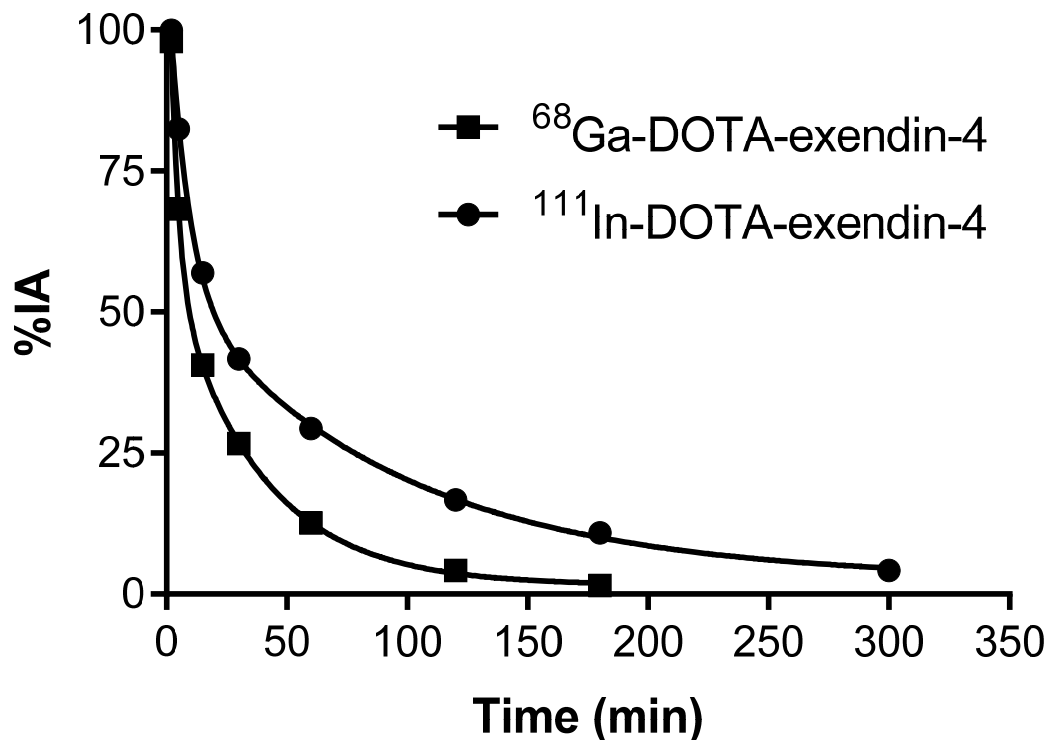

#### SUPPLEMENTAL FIGURE 1

Representative example of the blood clearance of  $^{68}\text{Ga}$ -DOTA-exendin-4 and  $^{111}\text{In}$ -DOTA-exendin-4, after blood sampling at 2, 5, 15, 30, 60, 120, and 180 min (additional sampling at 300 min, only  $^{111}\text{In}$ -DOTA-exendin-4) after injection of the radiotracers, in patient 1. The results were analyzed by GraphPad Prism software as a 2-phase exponential decay. The half-lives of  $^{68}\text{Ga}$ -DOTA-exendin-4 were estimated to be 11 min ( $\alpha$  phase) and 40 min ( $\beta$  phase), whereas longer half-lives of 17 min ( $\alpha$  phase) and 90 min ( $\beta$  phase) were estimated for  $^{111}\text{In}$ -DOTA-exendin-4. Values were not decay-corrected.
